# Supplementary material for: Hyperuricemia Is an Early and Relatively Common Feature in Children with HNF1B Nephropathy but Its Utility as a Predictor of the Disease Is Limited
Source: MDPI journal article supplement (doi:10.3390/jcm10153265), 2021-07-24
Supplement: s1 [file s1]

## Supplementary

**Table S1.** Results of univariate regression analysis performed in the entire cohort of patients

| Parameter           | B     | SE   | Beta  | t        | F        | R <sup>2</sup> |
|---------------------|-------|------|-------|----------|----------|----------------|
| Age                 | 0.17  | 0.02 | 0.58  | 7.83***  | 61.31*** | 0.33           |
| Mutation            | 0.71  | 0.28 | 0.23  | 2.56*    | 6.53*    | 0.05           |
| eGFR                | -0.02 | 0.00 | -0.53 | -6.29*** | 39.55*** | 0.28           |
| sMg                 | -5.60 | 1.18 | -0.41 | -4.76*** | 22.66*** | 0.17           |
| Hypomagnesemia      | 0.86  | 0.28 | 0.27  | 3.02**   | 9.12**   | 0.07           |
| IFG/DM              | 0.19  | 0.39 | 0.41  | 4.92***  | 24.23*** | 0.17           |
| PTH                 | 0.02  | 0.00 | 0.42  | 4.07***  | 16.57*** | 0.18           |
| Hyperparathyroidism | 1.04  | 0.44 | 0.26  | 2.36*    | 5.57*    | 0.07           |
| FEMg                | 0.21  | 0.05 | 0.41  | 4.48***  | 20.10*** | 0.17           |
| FEUA                | -0.18 | 0.06 | -0.30 | -3.08**  | 9.48**   | 0.09           |
| CKD                 | 0.98  | 0.29 | 0.43  | 3.35**   | 19.27**  | 0.18           |
| Hypertension        | 1.196 | 0.35 | 0.29  | 3.41**   | 11.63**  | 0.09           |

\* $p < 0.05$ ; \*\* $p < 0.01$ ; \*\*\* $p < 0.001$ . CKD, chronic kidney disease; DM, diabetes mellitus; eGFR, estimated glomerular filtration rate; FEMg, fractional excretion of  $\text{Mg}^{2+}$ ; FEUA, fractional excretion of uric acid; IFG, impaired fasting glucose; PTH, parathyroid hormone; sMg, serum  $\text{Mg}^{2+}$
